# Supplementary material
Source: PubMed Central journal article supplement (PMC9578169)
Supplement: mmc1.pdf [file mmc1.pdf]

**Supplemental information**

**SARS-CoV-2 infections elicit higher levels  
of original antigenic sin antibodies  
compared with SARS-CoV-2 mRNA vaccinations**

**Elizabeth M. Anderson, Shuk Hang Li, Moses Awofolaju, Theresa Eilola, Eileen Goodwin, Marcus J. Bolton, Sigrid Gouma, Tomaz B. Manzoni, Philip Hicks, Rishi R. Goel, Mark M. Painter, Sokratis A. Apostolidis, Divij Mathew, Debora Dunbar, Danielle Fiore, Amanda Brock, JoEllen Weaver, John S. Millar, Stephanie DerOhannessian, The UPenn COVID Processing Unit, Allison R. Greenplate, Ian Frank, Daniel J. Rader, E. John Wherry, Paul Bates, and Scott E. Hensley**

|                               | Infection  | Vaccination | p-value |
|-------------------------------|------------|-------------|---------|
| Total (N)                     | 10         | 23          |         |
| Median Age in years [min-max] | 35 [25-49] | 38 [23-67]  | 0.8735  |
| Number of Female [%]          | 8 [80%]    | 15 [65%]    | 0.6822  |

**Table S1.** Age and sex of individuals in this study. Related to the Figures 1-4 and the STAR Methods.
